# Supplementary material for: A disposable and sensitive sensor based on a ZIF-8@graphene modified carbon paper electrode for the quantitative determination of luteolin
Source: Royal Society of Chemistry journal article supplement (doi:10.1039/d3ay01126g), 2023-01-01
Supplement: d3ay01126g1.pdf [file d3ay01126g1.pdf]

# Supporting Information

**A disposable and sensitive sensor based on ZIF-8@graphene  
modified carbon paper electrode for the quantitative determination  
of luteolin**

Wanyu Pang <sup>a</sup>, Yali Gao <sup>a</sup>, Tuoping Hu <sup>a</sup>, Xuemei Ma <sup>a,\*</sup>

<sup>a</sup> College of chemistry and chemical engineering, North University of  
China, Taiyuan 030051, China.

\* Corresponding author: Xuemei Ma

E-mail

addresses:

maxuemei@nuc.edu.cn

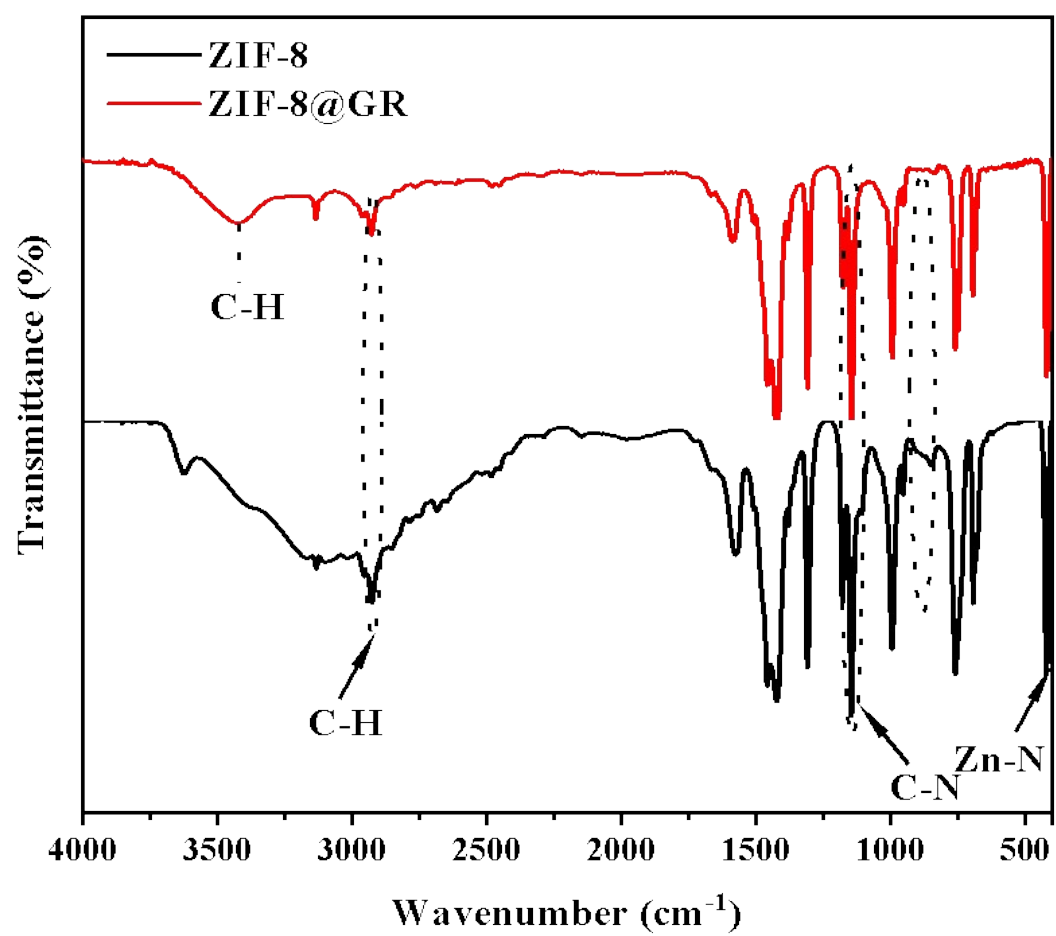

Fig. S1. FT-IR of ZIF-8 and ZIF-8@GR.

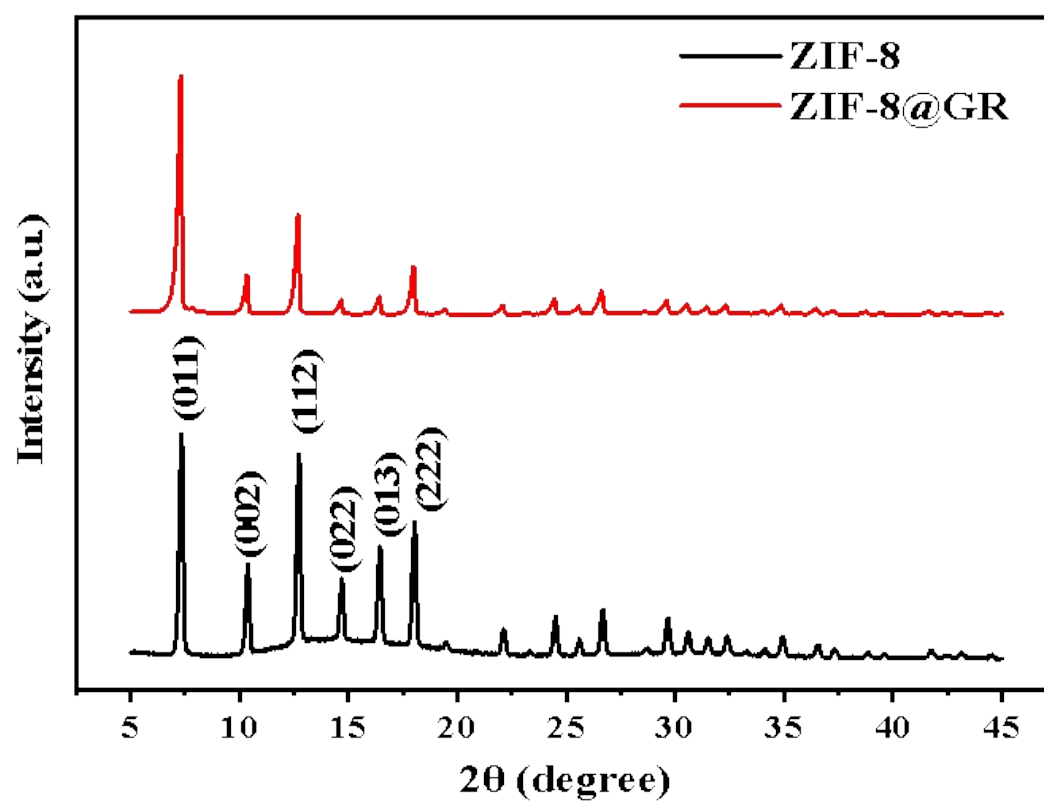

Fig. S2. XRD pattern of ZIF-8 and ZIF-8@GR.

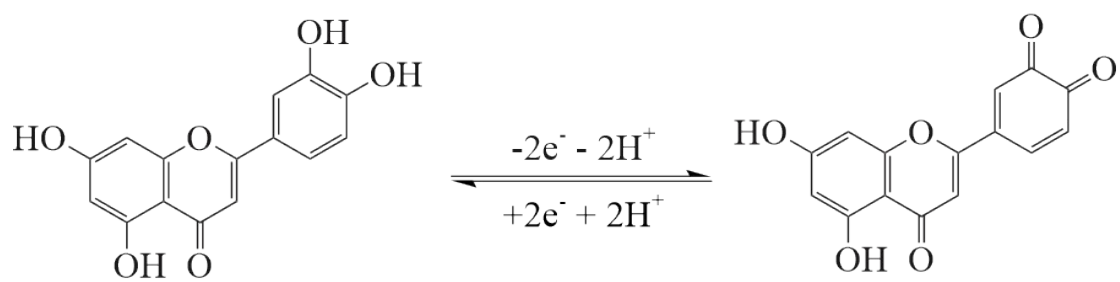

**Fig. S3.** Electrochemical oxidation mechanism of luteolin at ZIF-8@GR/CP.

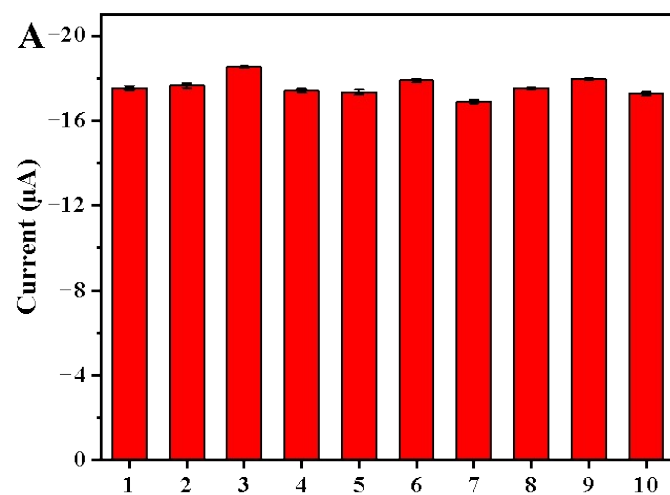

**Fig. S4.** (A) Repeatability, (B) Daytime stability, (C) Anti-interference of the luteolin sensor.
